# Supplementary material for: A sex-specific transcription factor controls male identity in a simultaneous hermaphrodite
Source: PubMed Central journal article supplement — Nat Commun. 2013 May 7;4:1814–. doi: 10.1038/ncomms2811 (PMC3674237; doi:10.1038/ncomms2811), 2013-05-07
Supplement: ncomms2811-s1.pdf [file ncomms2811-s1.pdf]

# **A sex-specific transcription factor controls male identity in a simultaneous hermaphrodite**

Tracy Chong<sup>1</sup>, James J. Collins III<sup>1</sup>, John L. Brubacher<sup>2</sup>, David Zarkower<sup>3</sup>, & Phillip A. Newmark<sup>1, 4\*</sup>

<sup>1</sup>Department of Cell and Developmental Biology, University of Illinois at Urbana-Champaign, 601 South Goodwin Avenue, Urbana, Illinois 61801, USA.

<sup>2</sup>Faculty of Humanities and Sciences, Canadian Mennonite University, 500 Shaftesbury Boulevard, Winnipeg, MB R3P 2N2, Canada.

<sup>3</sup>Department of Genetics, Cell Biology and Development, University of Minnesota Medical School, 6-160 Jackson Hall, 321 Church St. SE, Minneapolis, MN 55455, USA.

<sup>4</sup>Howard Hughes Medical Institute, University of Illinois at Urbana-Champaign, 601 South Goodwin Avenue, Urbana, Illinois 61801, USA.

\* P.A.N: [pnewmark@life.illinois.edu](mailto:pnewmark@life.illinois.edu)

Supplementary Figure S1- Molecular phylogenetic analysis of DM domains by maximum likelihood method.



The phylogenetic tree with the highest log likelihood after 500 bootstrap replicates is shown. The tree is drawn to scale with branch lengths measured as the number of substitutions per amino acid (scale bar). The percentage of trees in which associated taxa clustered together in more than 50% of bootstrap replicates is shown next to branches. Branches involving genes from Platyhelminthes species are colored red. The following species were used for phylogenetic analysis and are designated in the figure by genus name. Lophotrochozoans: the planarian *Schmidtea mediterranea*; the flukes *Schistosoma mansoni* and *Clonorchis sinensis*; the leech *Helobdella robusta*, and the mollusk *Crassostrea gigas*. Ecdysozoans: the branchiopod crustacean *Daphnia magna*; the tick *Ixodes scapularis*; the bee *Apis mellifera*; the fly *Drosophila melanogaster*, and the nematode worm *Caenorhabditis elegans*. Other metazoan taxa were the anemone *Nematostella vectensis* and four chordates: the cephalochordate *Branchiostoma floridae* (amphioxus); the hemichordate *Saccoglossus kowalevskii* (acorn worm); and the vertebrates *Mus musculus* (mouse) and *Oryzias latipes* (medaka fish). Pfam or GenBank accession numbers are indicated. *Helobdella* sequences are available at <http://genome.jgi-psf.org/Helo1/Helo1.home.html>. For proteins with two DM domains, the two domains are indicated as DM1 or DM2.

**Supplementary Figure S2 - Splice variants of *dmd-1* and regions of the gene that were used for RNAi experiments.**



We have identified four splice variants of *dmd-1*, with the longest open reading frame encoding a predicted protein of 341 amino acids.

**Supplementary Figure S3 - Experimental scheme for head regeneration.**



Animals were amputated between the ovaries and pharynx and allowed to regenerate new heads.

Supplementary Figure S4 - Expression of *dmd-1* in regenerating planarians.



**a)** Animals were amputated between the ovaries and pharynx and allowed to regenerate missing posterior structures. **b-d)** Two-color FISH showing *dmd-1* (green) and *gH4* (magenta) mRNAs in the old tissue and regenerating blastema (rb) of anterior fragments at day 3 (**b**), day 10 (**c**), and day 15 (**d**) post-amputation. Yellow boxes in (**d**) show location of the developing copulatory apparatus. Dotted lines in the left panels show amputation plane. Scale bars, 0.2 mm.

**Supplementary Figure S5 - Experimental scheme for generating sexually immature regenerates.**



Sexually mature planarians were amputated. After 14 days, the animals were fed liver to enable regeneration of their reproductive system. About one month post-amputation, the sexually immature regenerating animals were used for RNAi experiments.

**Supplementary Figure S6 - Female organs are present in *dmd-1*(RNAi) animals.**



The sperm ducts visualized by FISH to detect *grn* [GB:DN304193.1] transcripts (green) are absent in *dmd-1*(RNAi) animals compared to controls. Meanwhile, the glands associated with egg laying (*tsp-1* RNA [DN305069.1], magenta) are present in *dmd-1*(RNAi) and control animals. Scale bars, 1 mm.

**Supplementary Table S1 - Sequences of DM domain genes and dsRNA constructs.**

*dmd-1*, splice form 1 [GenBank: KC736555], used to generate riboprobes for in situ hybridization

AGCATTAGAACATGAATTTAACTCAATGCCATTGCGAAAATTAACGATTCTACCGGAAATTTTGGAAATTCACCATTGCATTGTTGAAGATGATAAAAGTGAAAA  
TAATGAAGACGTCAAACCGAATTTACTGAAAAAAGAATTTCTAGCAAATCGAGGAAAAAATCTCGTTCCCTACATACATGTGTAGAAAAATGTCGAGCCCATGGCCA  
GTTGTTGCCGGTGAAAAACCATCGTCGAAATTTGCCGTTTAAATTTGTGCCCTGTCCATTGTGTACAGTCGTTAGTCATGGTCGAGAAAAATGTCGCTCGTCAAAAT  
TAGACTTTATAGAAATCAGAAAGACATCAGCAAAAGGTCTCCGCAATCACCACATTTGTAGACGATGCAGAAATCATGGAGAACACAATGCTTGGAAAGGCCACA  
AAAAGAAATGTCGACATTTCAAATTTGCCCTGTAATTTGTGCCCTGTTAATTTACCATGAGAAAAACCAATGAAAAAGTTACAGAGAAATAGTTCAAGAAATCAGC  
AAGAGAAATCAATTTTAGTAAACAGCAACAATAATAGCAATAATAATAAACAATAGTTCCGCATTCTGTCTGTCAAACCGATCAAAGACAGATCACTGGCAG  
AAGATCAGTCAGTTTTTCTACGTAACATCAACCGAACTCCAATATTGCCAACGACAGGTTGGAATATCTACGACACCAATCAGCAGTTCACCTTTACGCTCAA  
ACTCAATGCTAACTTTTGAATTTCCGAAAACGCAACATTCGGCCCTTGAATTTGGTCAACAGCATCAGCCTATAAAGTTGGTTTACAGCCGTTGGGACACTAACG  
GATCGTTTGATATTCATAACACGCTCATATTGCCGACGCTCACACCTGAACAACATGATGATTGGAGGTCATAACGTTTCCAGCATAAATCCGTTGGAATATC  
TACCAACGGCGACTCCATCTTGGTATTCAAATTTTATTGAGATTGACTGGAATCTAACACGGATATAAATATAAATATATATTTACATTGAAAAAGACCT  
GTATTATTCAATTGACAAATATCTACTGGTTATATCTANATATGTAACGTGTGATGAATGAATATTTCTTTGGG

*dmd-1*, splice form 2 [GenBank: KC736556]

AGCATTAGAACATGAATTTAACTCAATGCCATTGCGAAAATTAACGATTCTACCGGAAATTTTGGAAATTCACCATTGCATTGTTGAAGATGATAAAAGTGAAAA  
TAATGAAGACGTCAAACCGAATTTACTGAAAAAAGAATTTCTAGCAAATCGAGGAAAAAATCTCGTTCCCTACATACATGTGTAGAAAAATGTCGAGCCCATGGCCA  
GTTGTTGCCGGTGAAAAACCATCGTCGAAATTTGCCGTTTAAATTTGTGCCCTGTCCATTGTGTACAGTCGTTAGTCATGGTCGAGAAAAATGTCGCTCGTCAAAAT  
TAGACTTTATAGAAATCAGAAAGACATCAGCAAAAGGTCTCCGCAATCACCACATTTGTAGACGATGCAGAAATCATGGAGAACACAATGCTTGGAAAGGCCACA  
AAAAGAAATGTCGACATTTCAAATTTGCCCTGTAATTTGTGCCCTGTTAATTTACCATGAGAAAAACCAATGAAAAAGTTACAGAGAAATAGTTCAAGAAATCAGC  
AAGAGAAATCAATTTTAGTAAACAGCAACAATAATAGCAATAATAATAAACAATAGTTCCGCATTCTGTCTGTCAAACCGATCAAAGACAGATCACTGGCAG  
AAGATCAGTCAGTTTTTCTACGTAACATCAACCGAACTCCAATATTGCCAACGACAGGTTGGAATATCTACGACACCAATCAGCAGTTCACCTTTACGCTCAA  
ACTCAATGCTAACTTTTCCGAATTTCCGAAAACGCAACATTCGGCCCTTGAATTTGGTCAACAGCATCAGCCTATAAAGTTGGTTTACAGCCGTTGGGACACTAACG  
GATCGTTTGATATTCATAACAGTAAATAGTATTATATAACCATTAGATTTGAATTTAGTGTTTTCTATTTTGCCTCAATTAGACGCTCATATTGCCGACGCTCAC  
ACCTGAACAACATGATGATTGGAGGTCATAACGTTTCCAGCATAAATCCGTTGGAATATCTAACACGGCGACTCCATCTTGGTATTCAAATTTTATTGAGATT  
GACTGGAATCTAACACGGATATAAATAAATATATATAATTTACATTGAAAAGACCTGTATTATTCAAATTGACAAATATCTACTGGTTATATCTANATATG  
AACTGTTGATGAATGAATATTTCTTTGGG

*dmd-1*, splice form 3 [GenBank: KC736557]

AGCATTAGAACATGAATTTAACTCAATGCCATTGCGAAAATTAACGATTCTACCGGAAATTTTGGAAATTCACCATTGCATTGTTGAAGATGATAAAAGTGAAAA  
TAATGAAGACGTCAAACCGAATTTACTGAAAAAAGAATTTCTAGCAAATCGAGGAAAAAATCTCGTTCCCTACATACATGTGTAGAAAAATGTCGAGCCCATGGCCA  
GTTGTTGCCGGTGAAAAACCATCGTCGAAATTTGCCGTTTAAATTTGTGCCCTGTCCATTGTGTACAGTCGTTAGTCATGGTCGAGAAAAATGTCGCTCGTCAAAAT  
TAGACTTTATAGAAATCAGAAAGACATCAGCAAAAGGTCTCCGCAATCACCACATTTGTAGACGATGCAGAAATCATGGAGAACACAATGCTTGGAAAGGCCACA  
AAAAGAAATGTCGACATTTCAAATTTGCCCTGTAATTTGTGCCCTGTTAATTTACCATGAGAAAAACCAATGAAAAAGTTACAGTAACGAGAACCAATATTTTTTTA  
TTGATAGTTTTTACTGTAAGATCCAGGAGAAATAGTTCAAGAAACTCACGAAGAGAAATCAATTTTAGGAAACAGCAACAATAATAGCAATAATAATAAACAAT  
AGTCCGCATCTGTCTGTCAAACCGATCAAAGACAGATCACTGGCAGAAAGATCAGTCAGTTTTTCTACGTAACATCAACCGAACTCCAATATTGCCAACGACA  
GGTTCGAATATCTACGACACCAATCAGCAGTTCACCTTTACGCTCAAACCTCAATGNTAACTTTTGAATTTCCGAAAACGCAACATTCGGCCCTTGAATTTG  
TCAACAGCATCAGCCTATAAG

*dmd-1*, splice form 4 [GenBank: KC736558]

AGCATTAGAACATGAATTTAACTCAATGCCATTGCGAAAATTAACGATTCTACCGGAAATTTTGGAAATTCACCATTGCATTGTTGAAGATGATAAAAGTGAAAA  
TAATGAAGACGTCAAACCGAATTTACTGAAAAAAGAATTTCTAGCAAATCGAGGAAAAAATCTCGTTCCCTACATACATGTGTAGAAAAATGTCGAGCCCATGGCCA  
GTTGTTGCCGGTGAAAAACCATCGTCGAAATTTGCCGTTTAAATTTGTGCCCTGTCCATTGTGTACAGTCGTTAGTCATGGTCGAGAAAAATGTCGCTCGTCAAAAT  
TAGACTTTATAGAAATCAGAAAGACATCAGCAAAAGGTCTCCGCAATCACCACATTTGTAGACGATGCAGAAATCATGGAGAACACAATGCTTGGAAAGGCCACA  
AAAAGAAATGTCGACATTTCAAATTTGCCCTGTAATTTGTGCCCTGTTAATTTACCATGAGAAAAACCAATGAAAAAGTTACAGAGAAATAGTTCAAGAAATCAGC  
AAGAGAAATCAATTTTAGTAAACAGCAACAATAATAGCAATAATAATAAACAATAGTTCCGCATTCTGTCTGTCAAACCGATCAAAGACAGATCACTGGCAG  
AAGATCAGTCAGTTTTTCTACGTAACATCAACCGAACTCCAATATTGCCAACGACAGGTTGGAATATCTACGACACCAATCAGCAGTTCACCTTTACGCTCAA  
TCCAGTTGATTGTTTGGGCCCTTGGTTTAAATTTGCTTTTACTGCTAAAACCTCAATGCTAACTTTTGAATTTCCGAAAACGCAACATTCGGCCCTTGAATTTG  
GTCAACAGCATCAGCCTATAAAGTTGGTTTACAGCCGTTGGGACACTAACGGATCGTTGATATTCATAACACGCTCATATTGCCGACGCTCACACCTGAACA  
ACATGATGATTGGAGGTCATAACGTTTCCAGCATAAATCCGTTGGAATATCTAACACGGCGACTCCATCTTGGTATTCAAATTTTATTGAGATTGACTGGAAT  
CTAACACGGATATAAATAAATATATATAATTTACATTGAAAAGACCTGTATTATTCAAATTGACAAATATCTACTGGTTATATCTATATATGTAACGTGTGTA  
TGAATGAATATTTCTTTGGG

*dmd-2*, splice form 1 [GenBank: KC736559]

ATGGAAAATTCTAATAGCTTTAATAATACAAAAATTAATTTAAGTAGTGTGGAATCTATTATAGATAATGAACCAAAAAGATTTTAAATCAAATCTTAAATGTTTG  
CAGCCTAGGCAAAATGTTTTGTCGAAATTTTGA AAAATACCAACGAACTCCTAAATGTGCACGTTGCCGCAATCATGGATATGTTTACCTTTAAAAAGGTCACAAG  
CGATACTGTAGATGAAAAGATTGTGCTGTGCAAAATGTGCTCTAATAGCGGAACGACAAAAGAGTGTGCGAGCTCAGGTTGCATTGCGGAGACAACAAGCGCA  
AGAGGAGCAGGAAATTAATGATTTTGTATGTATCAAAATGAAGAAATGTTTACC GCCAGATCCAAAAA

*dmd-2*, splice form 2 [GenBank: KC736560]

ATGGAAAATTCTAATAGCTTTAATAATACAAAAATTAATTTAAGTAGTGTGGAATCTATTATAGATAATGAACCAAAAAGATTTTAAATCAAATCTTAAATGTTTG  
CAGCCTAGGCAAAATGTTTTGTCGAAATTTTGA AAAATACCAACGAACTCCTAAATGTGCACGTTGCCGCAATCATGGATATGTTTACCTTTAAAAAGGTCACAAG  
CGATACTGTAGATGAAAAGATAAATCATTGCAATTTTCTGACTAATTAATTTTGGATTGTGCTGTGCAAAATGTGCTCTAATAGCGGAACGACAAAAG  
AGTGATGGCAGCTCAGGTTGCATTGCGGAGACAACAAGCGCAAGAGGAGCAGGAAATTAATGATTTTGTATGTATCAAAATGAAGAAATGTTTACC GCCAG  
ATTCCAAAAA

*dmd-3* [GenBank: KC736561]

ATGAAATATACAATGTCTCGAGAACCAAAAATGCGCCAGATGTGCAAAACCGGTGTTGTATCTTGTTTAAAAGGGCATAAGCGTTTTGTCACTGGAGAGAT  
TGCTACTGTAGTAACTGTTTACTGGTAATCGAAAAGACAAAGAGTTATGGCTGCCAAGTTGCTCTGAGGCGTCAGCAGACTACAAGCGCTTGTAACCTGCCAACG  
AACACCAAGACGAAAAGAGTTTCGTATAAACGGCTTATCAGACAAAGCATATCGACAGTGAATCCAAAAATCCCATACCATATTTAGGAAGCAATCTGAAA  
AAAAAGAATCGAATATGAAGAACAATTCATCTGGGTGCGTCAAGGCAATTTAGAACGGTTACCCGTTGATCTGGAACTCAATTTACTGAACGCTTCGGAAC  
GAAAAGCATTGCTGATGAAAATCTGATTAATTTCCAGTTTAAACAATCAACTAATCTGGTTAATATATCAACGAAAGTTGAAAATTTCCAATTTTAAATATA  
TAATTTAAACAAAATGCAATTTCAAAGAGGTATCACAATATGGTCAGTGAACAATTAAGTTCTGGATGGAACAGCTCAAAAAGAAATTTAGGAGTATTTG  
GAAGTGGAAAATCGAAGAAATTTCTTGATCAAAAATTTTATAGTAGACTCTATCCAGAAATCACAATTTACAATTTCAAAAACCAAAATAAAGTTATAAAAC  
GTGAAAATCGTCTTTATTGAGCGTCTTTGAAATGAAACTTTAAAATAACAATTCAAATATCCAAATTTATTTTAAATAGAGTTCTGCATATGTTAAAAA  
AAAAAA

*dmd-4* [GenBank: KC736562]

ATGGACAAAGAATCCAAAAGTGTCAAAAATCTTGTCTGATCAAACTCCAGAATTTCCAGAAAATTTCTTAAAATTAATGCAGCCCTCTTTATCCGATTACA  
GAAAAGGGTGTAGAAAACCGAAATGTGCAAGATGTAGAATACCGGAAATGGTATCGTGGTTAAAAGGCCACAAAAGACATTGTCATTACAAGGATTGCCGTT  
GTGCGAAATGCAATCTTATAGCTGAAAGACAACGAGTTATGGCAGCTCAAGTAGCATTGAAAAGACAACAAGCTGCCGAAGATGCAATCGCAATCGGTTAAGA  
ACAGCTTTAAATGAATCTCAACTTCCACTTTTAACCGCTGGACCTTTATGGGTCCAGGTTGCGTTAGTGCTCAAATTCAGCTCTCCAAACACATCAAATTACA  
ATGAATTAACAACAACAATAATGATGAATCTGGCAACATTTCAAACTGCACAAATGAAATCAATGATGATGGAAAAGTAAACTCAAATGATTTTACTGATTCT  
GACTCAAATCCGAGAAGACTGAAGACCATGATAAGTCATATCAAGAAACGACAAGTGAATAATAGAACGGATCAATGATAAAAATCAAAAACAATTTGCAA  
TGCACAAGAAATTTCAATTTTCTCAGATGAAAAGATACTTTCCAGCTAATAACGAAATCGGTAGTAAATCAGATCTTTTGGACTTATTAAGCATTTTTTCCACA  
TAAAATGGGATTTGATCCATTTCTTATGATGCATTAATGGAAAACACAATAACAATGTGTCCAAATGTTTGGAAAGAAATAATCGGGAACCTCATCAATCTATC  
TTCATTCACGAACCTCGAAGACTAATATCATGATCAGATTATGAAAACAATCTGTTCGATTAAAACGATTTATTTCCATATTCAAATGCTAATATTTCT  
CCTATGAGCATGTGCCAAAATCCGATTTTGCACCGAATCTCTTCAAATAATGATTTCAATAATATTTCCCTGAAATTCAAATTTTAAACCTACAATTCACAATC  
CATGCCCCATCAAATTTCAAATGAAAGCCTAATGCTGCCCTGCTTAATAATATCCCTGTAACCCATATCCACTTCCCTTACTTTTATTTAATCAGAGAATAC  
AACTTAAACAATGCTCCGAAGAAATTTTATGCAAAACACAGACAGATATTTCTGAGAAACCGATCAATTTCTCGGAAAAGATAATAAAAAATACAGTTTTA  
ATCAAATCAGAAAATTAATAAATTAATCAAAATCAAATTTCTAGAAGATCCACCTTCTGGCCATTAGTAGATTGGTTAATGAGGAATCAACATTAAGTTCAAC  
TTATAACCTTCAGTCATAATTTT

*dmd-1* RNAi sequence 1

TGTGTCCCTGTCCATTGTGTACAGCTGTTAGTCATGGTCGAGAAATGTGCGCTCGTCAAATAGACTTTATAGAAATCAGAAAGACATCAGCAAAAGGTTCTCCG  
AATCACCACATGTAGACGATGCAGAAATCATGGAGAACAACAATGCTTGGAAAAGGCCAC

*dmd-1* RNAi sequence 2

TGTGTCCCTGTCCATTGTGTGTCGCTGTTAGTCATGGTCGAGAAATGTGCGCTCGTCAAATAGACTTTATAGAAATCAGAAAGACATCAGCAAAAGGTTCTCCG  
AATCACCACATGTAGACGATGCAGAAATCATGGAGAACAACAATGCTTGGAAAAGGCCACAAAAGAAATGTGCGACATTCAAATGTCCCTGTAAATGTGCTG  
TTAATTACCATGAGAAAACCAAAAAA

**Supplementary Table S2 – Primers used for cloning and qPCR.**

| <b>Primers for cloning</b>                                                                                                                                                                                                                                                                                                                             |
|--------------------------------------------------------------------------------------------------------------------------------------------------------------------------------------------------------------------------------------------------------------------------------------------------------------------------------------------------------|
| <p><i>dmd-1</i><br/>           3' RACE outer: AACCATCGTCGAAATTGTCCG<br/>           3' RACE inner: TGTGTCCCTGTCCATTGTGT<br/>           5' RACE outer: AACTGCTGTGACTGGTGTCTG<br/>           5' RACE inner: TGTCGTTGGCAATATTGGAG<br/>           Full-length F: AACATGAATTTAACTCAATGCCATTC<br/>           Full-length R: CAATTGAATAAATACAGGTCTTTTCAATG</p> |
| <p><i>dmd-2</i><br/>           3' RACE outer: TTTAAATCAAATCTTAAATGTTTGCAG<br/>           3' RACE inner: GCAGCCTAGGCAAATGTTTT</p>                                                                                                                                                                                                                       |
| <p><i>dmd-3</i><br/>           3' RACE outer: TCTCGAGAACACCAAATGC<br/>           3' RACE inner: GTCGAAACCACGGTGTGTA</p>                                                                                                                                                                                                                                |
| <p><i>dmd-4</i><br/>           3' RACE outer: TGGACAAAGAATCCAAAAAGTG<br/>           3' RACE inner: ATTAATGCAGCCCCCTCTTT</p>                                                                                                                                                                                                                            |
| <b>Primers for qPCR</b>                                                                                                                                                                                                                                                                                                                                |
| <p><i>Smed_dmd-1</i> F: GACGTCAAACCGAATTTACTGA<br/> <i>Smed_dmd-1</i> R: TTTCACCGGCAACAACCTG</p>                                                                                                                                                                                                                                                       |
| <p><i>smedwi-1</i> F: GATTACGATTCGTGGTTCGTG<br/> <i>smedwi-1</i> R: CTGTGCCTTTAGGAACGTCA</p>                                                                                                                                                                                                                                                           |
| <p><i>nanos</i> F: CAAGGACAAATGTTGCCTGTA<br/> <i>nanos</i> R: CAACCCATCGATCCAACCTCT</p>                                                                                                                                                                                                                                                                |
| <p><i>β-tubulin</i> F: TGGCTGCTTGTGATCCAAGA<br/> <i>β-tubulin</i> R: AAATTGCCGCAACAGTCAAATA</p>                                                                                                                                                                                                                                                        |
| <p><i>Sm_dmd-1</i> F: GGACATGGTATGTCTGAACCAG<br/> <i>Sm_dmd-1</i> R: TGTTGGGCTACTATACGACGAC</p>                                                                                                                                                                                                                                                        |
| <p><i>Sm_cytochrome c oxidase</i> F: GTGGGAGTCTTTGGTTGTTG<br/> <i>Sm_cytochrome c oxidase</i> R: CCACCCACAACCTTAGAAGCA</p>                                                                                                                                                                                                                             |

**Supplementary Table S3 – RNAi feeding schedule.**

|                                                                                                           |                                                   |
|-----------------------------------------------------------------------------------------------------------|---------------------------------------------------|
| Asexuals ( <i>dmd-1</i> dsRNA)                                                                            | 7 feedings, ~6 weeks                              |
| Asexuals ( <i>nanos</i> dsRNA)                                                                            | 6 feedings, ~5 weeks                              |
| Animals devoid of germ cells ( <i>dmd-1</i> dsRNA)                                                        | 2 feedings over 8 days before amputation          |
| Recently hatched planarians ( <i>dmd-1</i> dsRNA)                                                         | 9 feedings, ~2 months                             |
| Sexually mature planarians ( <i>dmd-1</i> dsRNA)                                                          | 12-14 feedings, ~ 2 months                        |
| Sexually immature regenerates, examination of testes and ovaries ( <i>dmd-1</i> dsRNA)                    | 5 feedings, ~ 1 month, 12-13 feedings, ~ 3 months |
| Sexually immature regenerates, examination of sperm ducts/seminal vesicles/oviducts ( <i>dmd-1</i> dsRNA) | 20 feedings, ~ 5 month                            |
